# Supplementary material for: HIV-1 Envelope Subregion Length Variation during Disease Progression
Source: PubMed Central journal article supplement (PMC3002983; doi:10.1371/journal.ppat.1001228), 2010-12-16
Supplement: ppat.1001228.s016.pdf [file ppat.1001228.s016.pdf]

| <b>Author</b>  | <b>Ref</b> | <b>Accession Numbers</b>                                                         |
|----------------|------------|----------------------------------------------------------------------------------|
| Aasa-Chapman   | [1]        | AY295200-12, 22-26, 33-38                                                        |
| Bagnarelli     | [2]        | AF105432-5961                                                                    |
| Bello          | [3]        | AY497912-8031                                                                    |
| Dacheux        | [4]        | AY535425-518                                                                     |
| Daniels        | [5]        | AJ535590-619                                                                     |
| Delwart        | [6]        | AF403510-38                                                                      |
| Derdeyn        | [7]        | AY423908-4198                                                                    |
| Fang           | [8]        | U69584-93                                                                        |
| Frost          | [9]        | Obtained directly from Authors                                                   |
| Haaland        | [11]       | FJ185853-7678                                                                    |
| Hayman         | [12]       | AY428618-20                                                                      |
| Kuhmann        | [13]       | AY357345, AY357515-580                                                           |
| McDonald       | [14]       | U69282-391, U69396, U69401-481                                                   |
| Poss           | [15]       | AF047981- 8284, -8523, -8536-44, -69, -73, -75-8, -591, 598-603, 611, 656, 668-9 |
| Quiñones-Mateu | [16]       | U16764, U16772-778                                                               |
| Shioda         | [17]       | AB002829-2974, -2988-3019                                                        |
| Spudich        | [18]       | AY842796-2807, AY842815-23                                                       |
| Wei            | [19]       | AY223719- AY223790                                                               |
| Yi             | [20]       | DQ853426-DQ853435, DQ853455-DQ853464, EU588732-EU588968                          |
| Zheng          | [21]       | AJ418478- AJ418530                                                               |
| Zhu            | [22]       | L21224, L21234-302                                                               |

**Table S1. Published sequence data.** Accession Numbers for previously published sequences included in cross-sectional, longitudinal and transmission analyses.

## References

1. Aasa-Chapman MM, Hayman A, Newton P, Cornforth D, Williams I, et al. (2004) Development of the antibody response in acute HIV-1 infection. *AIDS* 18: 371-381.
2. Bagnarelli P, Mazzola F, Menzo S, Montroni M, Butini L, et al. (1999) Host-specific modulation of the selective constraints driving human immunodeficiency virus type 1 env gene evolution. *J Virol* 73: 3764-3777.
3. Bello G, Casado C, Garcia S, Rodriguez C, del Romero J, et al. (2004) Co-existence of recent and ancestral nucleotide sequences in viral quasispecies of human immunodeficiency virus type 1 patients. *J Gen Virol* 85: 399-407.
4. Dacheux L, Moreau A, Ataman-Onal Y, Biron F, Verrier B, et al. (2004) Evolutionary dynamics of the glycan shield of the human immunodeficiency virus envelope during natural infection and implications for exposure of the 2G12 epitope. *J Virol* 78: 12625-12637.
5. Daniels RS, Wilson P, Patel D, Longhurst H, Patterson S (2004) Analysis of full-length HIV type 1 env genes indicates differences between the virus infecting T cells and dendritic cells in peripheral blood of infected patients. *AIDS Res Hum Retroviruses* 20: 409-413.
6. Delwart E, Magierowska M, Royz M, Foley B, Peddada L, et al. (2002) Homogeneous quasispecies in 16 out of 17 individuals during very early HIV-1 primary infection. *AIDS* 16: 189-195.
7. Derdeyn CA, Decker JM, Bibollet-Ruche F, Mokili JL, Muldoon M, et al. (2004) Envelope-constrained neutralization-sensitive HIV-1 after heterosexual transmission. *Science* 303: 2019-2022.
8. Fang G, Burger H, Chappay C, Rowland-Jones S, Vidosky A, et al. (2001) Analysis of transition from long-term nonprogressive to progressive infection identifies sequences that may attenuate HIV type 1. *AIDS Res Hum Retroviruses* 17: 1395-1404.
9. Frost SD, Liu Y, Pond SL, Chappay C, Wrin T, et al. (2005) Characterization of human immunodeficiency virus type 1 (HIV-1) envelope variation and neutralizing antibody responses during transmission of HIV-1 subtype B. *J Virol* 79: 6523-6527.
10. Gao F, Morrison SG, Robertson DL, Thornton CL, Craig S, et al. (1996) Molecular cloning and analysis of functional envelope genes from human immunodeficiency virus type 1 sequence subtypes A through G. The WHO and NIAID Networks for HIV Isolation and Characterization. *J Virol* 70: 1651-1667.
11. Haaland RE, Hawkins PA, Salazar-Gonzalez J, Johnson A, Tichacek A, et al. (2009) Inflammatory genital infections mitigate a severe genetic bottleneck in heterosexual transmission of subtype A and C HIV-1. *PLoS Pathog* 5: e1000274.

12. Hayman A, Moss T, Simmons G, Arnold C, Holmes EC, et al. (2001) Phylogenetic analysis of multiple heterosexual transmission events involving subtype B of HIV type 1. *AIDS Res Hum Retroviruses* 17: 689-695.
13. Kuhmann SE, Pugach P, Kunstman KJ, Taylor J, Stanfield RL, et al. (2004) Genetic and phenotypic analyses of human immunodeficiency virus type 1 escape from a small-molecule CCR5 inhibitor. *J Virol* 78: 2790-2807.
14. McDonald RA, Mayers DL, Chung RC, Wagner KF, Ratto-Kim S, et al. (1997) Evolution of human immunodeficiency virus type 1 env sequence variation in patients with diverse rates of disease progression and T-cell function. *J Virol* 71: 1871-1879.
15. Poss M, Rodrigo AG, Gosink JJ, Learn GH, de Vange Panteleeff D, et al. (1998) Evolution of envelope sequences from the genital tract and peripheral blood of women infected with clade A human immunodeficiency virus type 1. *J Virol* 72: 8240-8251.
16. Quinones-Mateu ME, Holguin A, Dopazo J, Najera I, Domingo E (1996) Point mutant frequencies in the pol gene of human immunodeficiency virus type 1 are two- to threefold lower than those of env. *AIDS Res Hum Retroviruses* 12: 1117-1128.
17. Shioda T, Oka S, Xin X, Liu H, Harukuni R, et al. (1997) In vivo sequence variability of human immunodeficiency virus type 1 envelope gp120: association of V2 extension with slow disease progression. *J Virol* 71: 4871-4881.
18. Spudich SS, Huang W, Nilsson AC, Petropoulos CJ, Liegler TJ, et al. (2005) HIV-1 chemokine coreceptor utilization in paired cerebrospinal fluid and plasma samples: a survey of subjects with viremia. *J Infect Dis* 191: 890-898.
19. Wei X, Decker JM, Wang S, Hui H, Kappes JC, et al. (2003) Antibody neutralization and escape by HIV-1. *Nature* 422: 307-312.
20. Liu Y, Curlin ME, Diem K, Zhao H, Ghosh AK, et al. (2008) Env length and N-linked glycosylation following transmission of human immunodeficiency virus Type 1 subtype B viruses. *Virology* 374: 229-233.
21. Zheng NN, Vella C, Easterbrook PJ, Daniels RS (2002) Selection following isolation of human immunodeficiency virus type 1 in peripheral blood mononuclear cells and herpesvirus saimiri-transformed T cells is comparable. *J Gen Virol* 83: 1343-1352.
22. Zhu T, Mo H, Wang N, Nam DS, Cao Y, et al. (1993) Genotypic and phenotypic characterization of HIV-1 patients with primary infection. *Science* 261: 1179-1181.
