# Supplementary material for: HIV-1 Envelope Subregion Length Variation during Disease Progression
Source: PubMed Central journal article supplement (PMC3002983; doi:10.1371/journal.ppat.1001228), 2010-12-16
Supplement: ppat.1001228.s017.pdf [file ppat.1001228.s017.pdf]

| Factor                | Time since infection (Model 1) |               |             | Infection Stage (Model 2) |               |              |
|-----------------------|--------------------------------|---------------|-------------|---------------------------|---------------|--------------|
|                       | All seqs                       | Plasma        | PBMC        | All seqs                  | Plasma        | PBMC         |
| Time since infection  | 0.74 (0.8)                     | 0.50 (<0.001) | 0.72 (0.8)  |                           |               |              |
| Stage 1               |                                |               |             | Ref                       | Ref           | Ref          |
| Stage 2               |                                |               |             | 0.01 (0.9)                | -0.01 (0.9)   | 0.00 (NA)    |
| Stage 3               |                                |               |             | 4.78 (<0.001)             | 5.23 (<0.001) | 2.81 (0.2)   |
| Stage 4               |                                |               |             | 2.32 (0.07)               | 1.50 (0.18)   | 6.88 (0.02)  |
|                       |                                |               |             |                           |               |              |
| Factor                | CD4 count (Model 3)            |               |             | Viral Load (Model 4)      |               |              |
| CD4 level             | All seqs                       | Plasma        | PBMC        | All seqs                  | Plasma        | PBMC         |
| >500                  | Ref                            | Ref           | Ref         |                           |               |              |
| 200-500               | 0.41 (0.7)                     | 0.32 (0.8)    | 6.36 (0.09) |                           |               |              |
| <200                  | -0.65 (0.7)                    | -1.34 (0.3)   | 5.12 (0.2)  |                           |               |              |
| VL log10 (continuous) |                                |               |             | -0.39 (0.3)               | -0.30 (0.4)   | -0.84 (0.15) |

**Table S2. Multivariable regression analysis of V1V2 length vs. clinical variables, upper and lower 5% excluded.** Beta coefficients for V1V2 Length vs. Time since Infection (Model 1), Stage of Infection (Model 2), CD4 counts (Model 3) or HIV Viral Load (Model 4).  $\beta$  values and p-values (in parentheses) are shown. Results are stratified by sample type (Plasma vs. PBMC), adjusting for year of sample collection. Time since infection was missing for 5 sequences, stage of infection for 242 sequences, CD4 count for 113 sequences, and viral load for 290 sequences with measured V1V2 length. Ref = Reference group. Analyses were performed for all sequences collectively as well as for sequences derived from plasma and PBMC considered separately. Sequences comprising the upper and lower 5% by length were excluded from these analyses.
